# Supplementary material for: Nicotinamide riboside supplementation alters body composition and skeletal muscle acetylcarnitine concentrations in healthy obese humans
Source: PubMed Central journal article supplement — Am J Clin Nutr. 2020 Apr 22;112(2):413–26. doi: 10.1093/ajcn/nqaa072 (PMC7398770; doi:10.1093/ajcn/nqaa072), 2020-04-22

**Nicotinamide riboside supplementation alters body composition and skeletal muscle acetylcarnitine concentrations in healthy obese humans, by Remie et al. (2019)**

On-line Supplementary Material

Supplementary material for

**Nicotinamide riboside supplementation alters body composition and skeletal muscle acetylcarnitine concentrations in healthy obese humans**

Carlijn M.E. Remie, Kay H.M. Roumans, Michiel P.B. Moonen, Niels J. Connell, Bas Havekes, Julian Mevenkamp, Lucas Lindeboom, Vera H.W. de Wit, Tineke van de Weijer, Suzanne A.B.M. Aarts, Esther Lutgens, Bauke V. Schomakers, Hyung L. Elfrink, Rubén Zapata-Pérez, Riekelt H. Houtkooper, Johan Auwerx, Joris Hoeks, Vera B. Schrauwen-Hinderling, Esther Phielix, Patrick Schrauwen

Correspondence to:  
Prof. Patrick Schrauwen, PhD  
Email: [p.schrauwen@maastrichtuniversity.nl](mailto:p.schrauwen@maastrichtuniversity.nl)

**This PDF file includes:**

Supplementary Table 1  
Supplementary Table 2  
Supplementary Figure 1

**Supplementary Table 1. Internal standard mixture for NAD<sup>+</sup> targeted metabolomics in skeletal muscle biopsies**

| <b>Internal standard</b>                                        | <b>Concentration (<math>\mu\text{M}</math>)</b> |
|-----------------------------------------------------------------|-------------------------------------------------|
| Adenosine- <sup>15</sup> N <sub>5</sub> -monophosphate          | 100                                             |
| Adenosine- <sup>15</sup> N <sub>5</sub> -triphosphate           | 1000                                            |
| D <sub>4</sub> -alanine                                         | 100                                             |
| D <sub>7</sub> -arginine                                        | 100                                             |
| D <sub>3</sub> -aspartic acid                                   | 100                                             |
| D <sub>4</sub> -citric acid                                     | 100                                             |
| <sup>13</sup> C <sub>1</sub> -citrulline                        | 100                                             |
| <sup>13</sup> C <sub>6</sub> -fructose-1,6-diphosphate          | 100                                             |
| Guanosine- <sup>15</sup> N <sub>5</sub> -monophosphate          | 100                                             |
| Guanosine- <sup>15</sup> N <sub>5</sub> -triphosphate           | 1000                                            |
| <sup>13</sup> C <sub>6</sub> -glucose                           | 1000                                            |
| <sup>13</sup> C <sub>6</sub> -glucose-6-phosphate               | 100                                             |
| D <sub>3</sub> -glutamic acid                                   | 100                                             |
| D <sub>5</sub> -glutamine                                       | 100                                             |
| <sup>13</sup> C <sub>6</sub> -isoleucine                        | 100                                             |
| D <sub>3</sub> -leucine                                         | 100                                             |
| D <sub>4</sub> -lysine                                          | 100                                             |
| D <sub>3</sub> -methionine                                      | 100                                             |
| D <sub>6</sub> -ornithine                                       | 100                                             |
| D <sub>5</sub> -phenylalanine                                   | 100                                             |
| D <sub>7</sub> -proline                                         | 100                                             |
| <sup>13</sup> C <sub>3</sub> -pyruvate                          | 100                                             |
| D <sub>3</sub> -serine                                          | 100                                             |
| D <sub>5</sub> -tryptophan                                      | 100                                             |
| D <sub>4</sub> -tyrosine                                        | 100                                             |
| D <sub>8</sub> -valine                                          | 100                                             |
| <sup>13</sup> C <sub>5</sub> -nicotinamide adenine dinucleotide | 100                                             |

**Supplementary Table 2. Subject characteristics**

| <b>Parameter</b>                       | <b>Mean <math>\pm</math> SD</b> |
|----------------------------------------|---------------------------------|
| Gender F/M                             | 7/6                             |
| Age (years)                            | 59 $\pm$ 5                      |
| Body weight (kg)                       | 87.2 $\pm$ 13.6                 |
| Height (m)                             | 1.70 $\pm$ 0.11                 |
| BMI (kg/m <sup>2</sup> )               | 30.2 $\pm$ 2.6                  |
| VO <sub>2</sub> peak (ml/min/kg)       | 27.0 $\pm$ 5.7                  |
| Physical activity level (Baecke score) | 7.51 $\pm$ 1.16                 |

BMI, body mass index; VO<sub>2</sub>peak, peak oxygen consumption.

**Supplementary Figure 1. Flowchart subject inclusion**

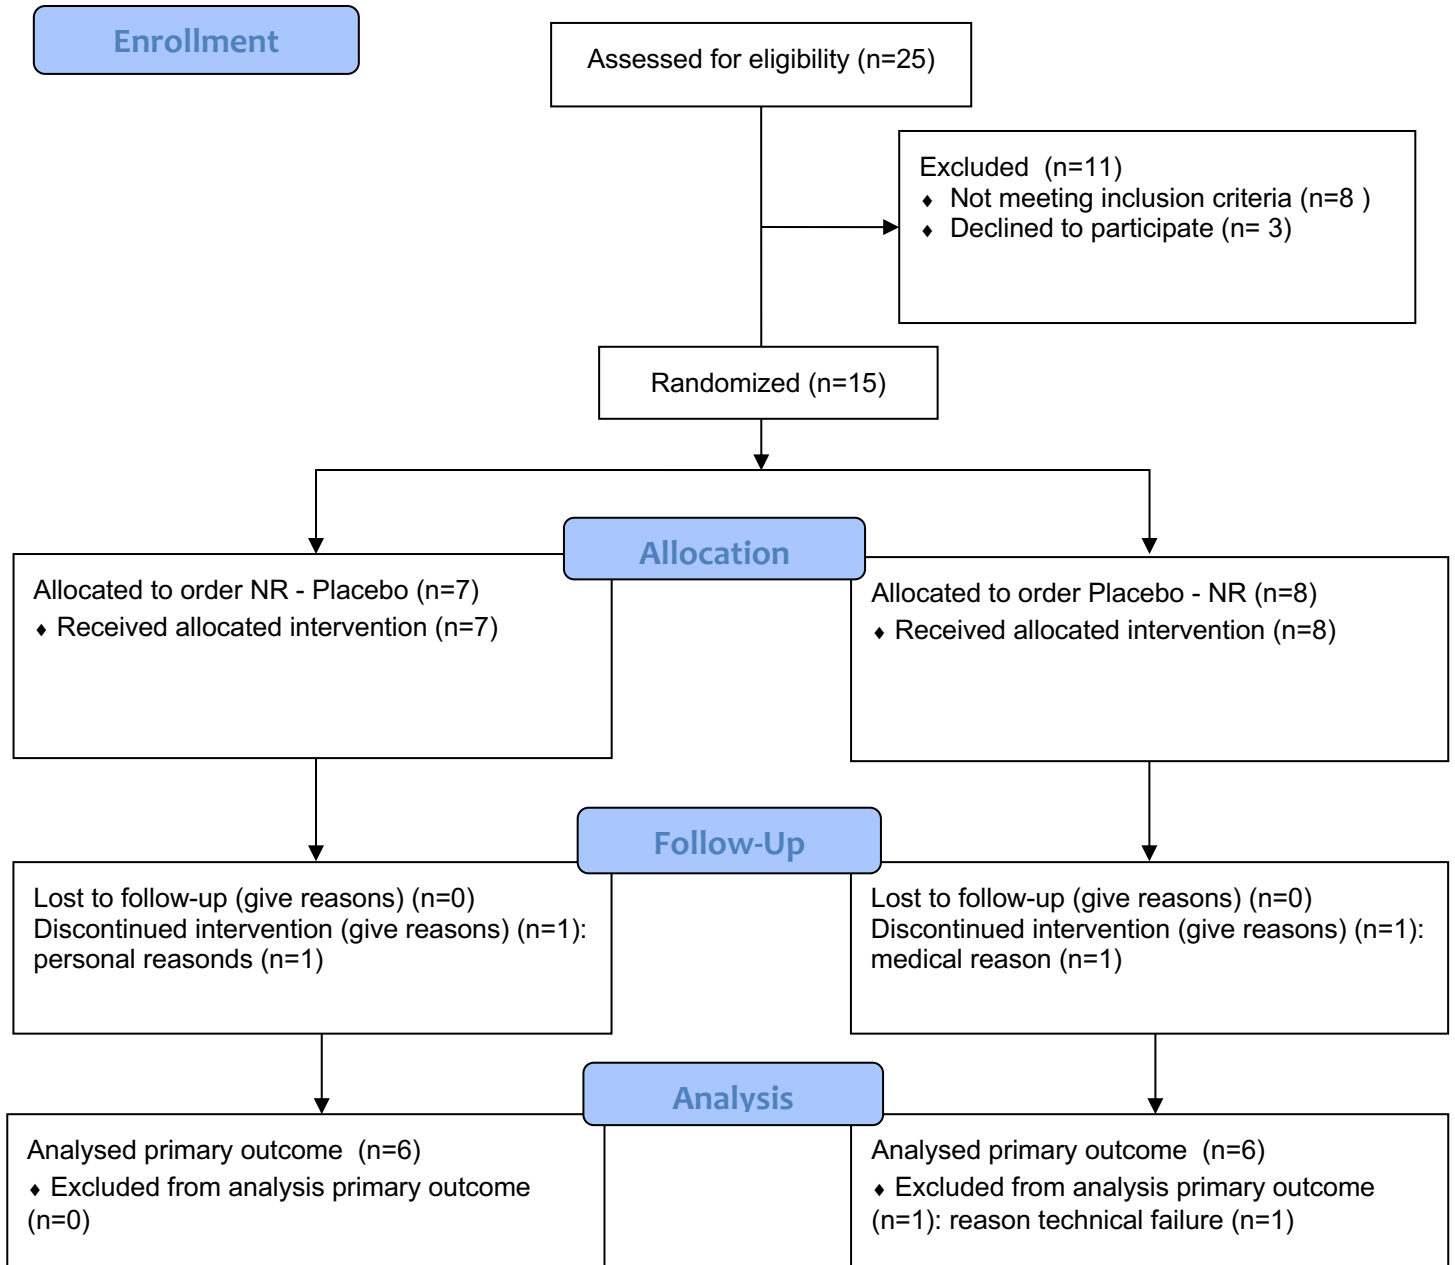

Supplement: nqaa072_supplement_file.pdf [file nqaa072_supplement_file.pdf]
